# Supplementary material for: Sonic Hedgehog Agonist Protects Against Complex Neonatal Cerebellar Injury
Source: PubMed Central journal article supplement (PMC5849674; doi:10.1007/s12311-017-0895-0), 2017-11-13

# P11 Hx + Pred

DAPI *Gli1* Calbindin

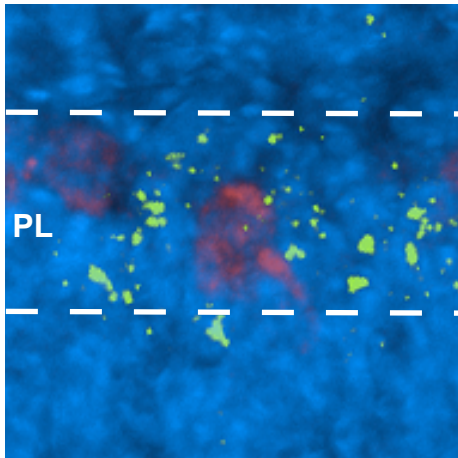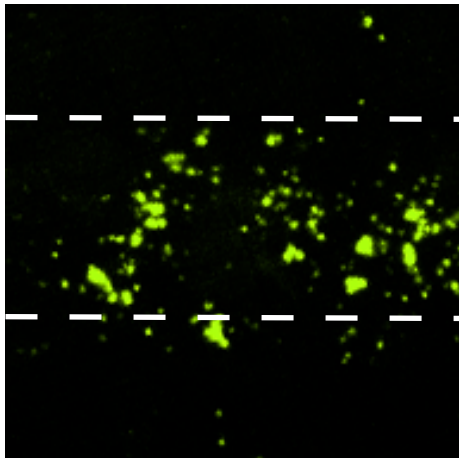

Supplement: 12311_2017_895_MOESM4_ESM.pdf [file 12311_2017_895_MOESM4_ESM.pdf]
