# Supplementary material for: Sonic Hedgehog Agonist Protects Against Complex Neonatal Cerebellar Injury
Source: Springer Nature journal article supplement (doi:10.1007/s12311-017-0895-0), 2017-11-13

# P11 Hx + Pred

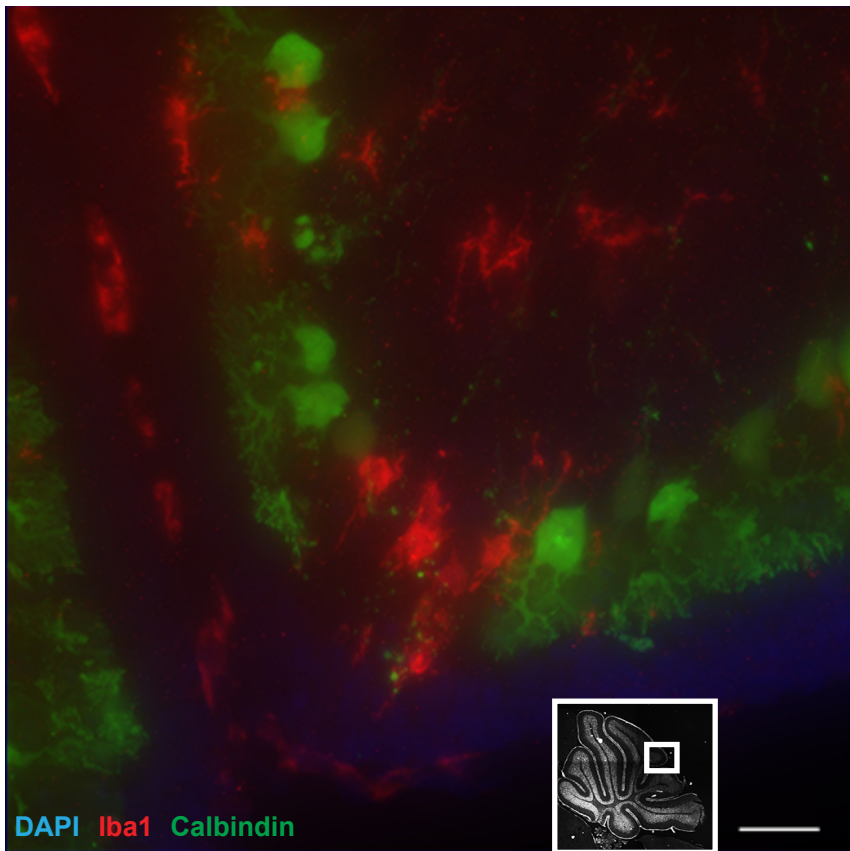

Supplement: MOESM2 [file 25640734]
